# Supplementary material for: Pereskia bleo augments NK cell cytotoxicity against triple-negative breast cancer cells (MDA-MB-231)
Source: PeerJ. 2024 Nov 28;12:e18420. doi: 10.7717/peerj.18420 (PMC11608567; doi:10.7717/peerj.18420)
Supplement: Data S1 [file peerj-12-18420-s001.xlsx]

## Sheet: Cytokines in HCs
		IFN-γ	IL-12	IL-18	IL-10	IL-8	Perforin	Granzyme B
	60	30.8771	97.401	138.19	49.01	43.15	568.07	518.31
		30.92	98.22	138.6	49.37	43.63	568.4	518.6
		30.9629	99.039	139.01	49.73	44.11	568.73	518.89
	30	64.0613	138.52	160.83	48.07	39.815	512.1	664.79
		64.49	138.6	161.2	48.45	39.83	512.28	665.2
		64.9187	138.68	161.57	48.83	39.845	512.46	665.61
	15	70.9458	159.934	173.09	47.34	28.15	763.1	776.72
		71.35	160.4	173.4	47.6	28.43	763.36	777.1
		71.7542	160.866	173.71	47.86	28.71	763.62	777.48
	7.5	154.994	167.02	190.71	44.69	29.43	937.9	910.19
		155.3	167.5	191.3	45.3	29.63	938.16	910.5
		155.606	167.98	191.89	45.91	29.83	938.42	910.81
	3.75	123.341	74.334	155.61	47.55	30.15	848.78	445.38
		123.5	74.9	156.3	47.77	30.47	848.9	445.7
		123.659	75.466	156.99	47.99	30.79	849.02	446.02
	0	21.9009	36.404	23.01	91	110.63	11.74	17.25
		22.44	36.87	23.63	91.39	110.8	12.08	17.77
		22.9791	37.336	24.25	91.78	110.97	12.42	18.29
	60	30.92±0.025	98.22±0.47	138.60±0.24	49.37±0.21	43.63±0.28	568.4±0.19	518.60±0.17
	30	64.49±0.25	138.60±0.05	161.2±0.21	48.45±0.22	39.83±0.01	512.28±0.10	665.2±0.24
	15	71.35±0.23	160.4±0.27	173.4±0.18	47.60±0.15	28.43±0.16	763.36±0.15	777.1±0.22
	7.5	155.3±0.18	167.5±0.28	191.3±0.34	45.30±0.35	29.63±0.12	938.16±0.15	910.5±0.18
	3.75	123.5±0.09	74.90±0.33	156.30±0.40	47.77±0.13	30.47±0.18	848.90±0.07	445.7±0.18
	0	22.44±0.31	36.87±0.27	23.63±0.36	91.39±0.23	110.8±0.10	12.08±0.20	17.77±0.30

## Sheet: Cytokines HC vs diseased
Breast cancer patients						Healthy women
	Group 1	Group 2	Group 3	Group 4		Group 1	Group 2	Group 3	Group 4
Granzyme B	0	0	710	822.15		0	0	623.79	708.81
	0	0	688.4	799.9		0	0	720.1	830
	0	0	700.99	910.9		0	0	600.88	700.12
Perforin	0	0	539.31	823.1		0	0	453.94	630.62
	0	0	500.01	799.99		0	0	453.5	633.11
	0	0	489.99	800.02		0	0	456.2	636.1
IFN-y	0	0	89.27	125.75		0	0	61	103.88
	0	0	88.8	126.5		0	0	60.2	102.2
	0	0	90.4	124.2		0	0	60.98	100.15
Breast cancer patients (Mean)						Healthy women (Mean)
Groups	IFN-γ	Perforin	Granzyme B			Groups	IFN-γ	Perforin	Granzyme B
Group 1	ND	ND	ND			Group 1	ND	ND	ND
Group 2	ND	ND	ND			Group 2	ND	ND	ND
Group 3	89.49±0.47	509.8±15.05	699.8±6.26			Group 3	60.73±0.26	454.5±0.8	648.3±36.53
Group 4	125.5±0.68	807.7±7.7	844.5±33.91			Group 4	102.1± 1.08	633.3±1.58	746.3±41.92

## Sheet: Apoptosis, cytokines
					Healthy donors				cancer donors
				Living cells	99.67	46.95	44.96	19.17	99.62	45.16	42.96	13.88
					99.57	48.04	48.27	20.22	98.99	46.3	43.99	13.22
					99.51	50.76	46.2	21.01	99.8	44.7	41.78	14.61
				Apoptotic cells	0.3	52.84	54.86	80.53	0.31	54.59	56.84	85.82
					0.39	51.76	51.53	79.46	0.92	53.43	55.71	86.58
					0.44	49.02	53.59	78.66	0.1	55	57.82	84.99
				Necrotic cells	0.03	0.21	0.18	0.3	0.07	0.25	0.2	0.3
					0.04	0.2	0.19	0.32	0.09	0.27	0.3	0.2
					0.05	0.22	0.21	0.33	0.1	0.3	0.4	0.4
				Type of apoptotic cells	Group 1	Group 2	Group 3	Group 4	Group 1	Group 2	Group 3	Group 4
				Living cells	99.58± 0.04	48.58±1.13	46.48±0.96	20.13±0.5	99.47±0.25	45.39±0.48	42.91±0.64	13.90±0.4
				Apoptotic cells	0.38±0.04	51.21±1.14	53.33±0.97	79.55±0.54	0.44±0.25	54.34±0.47	56.79±0.61	85.8±0.46
				Necrotic cells	0.04±0.006	0.21±0.006	0.19±0.009	0.32±0.009	0.09±0.009	0.27±0.015	0.30±0.06	0.30±0.06
NK cells numbers
healty	Cancer
830000	440000
790000	420000
810000	430000
8.1x105 cells/ml	4.3x105 cells/ml
NK cells purification %
	87.2
	87.1
	87.05
	87
	87.02
	87.14

## Sheet: Table 1 and 2
	There is no raw data as we provided the description about the experimental groups only. There are no results.
	Table 1 and 2 belongs to methadology section. There are no results.
